# Supplementary material for: Halogen fractionation during vapor-brine phase separation revealed by in situ Cl, Br, and I analysis of scapolite from the Yixingzhai gold deposit, North China Craton
Source: publisher site journal article supplement (doi:10.2138/am-2022-8826), 2023-04-26
Supplement: Supplementary file 1 [file am-2022-8826_sm.zip]

## Sheet: Scapolite
American Mineralogist: March 2024 Online Materials AM-24-38826 (use tabs to navigate to other tables)
Gao et al.: Halogen fractionation during vapor-brine phase separation
Representative EPM analyses of scapolite from the Tietangdong breccia pipe
	1300 m
Sample no.	TTD18	TTD18	TTD18	TTD18	TTD18	TTD18	TTD18	TTD18	TTD18	TTD18	TTD18	TTD18	TTD18	TTD18	TTD18	TTD18	TTD18	TTD18	TTD18	TTD18	18scp-3d-03-01	18scp-3d-03-02	18scp-3d-03-03	18scp-3d-03-04	18scp-3d-03-05	18scp-3d-04-01	18scp-3d-04-02	18scp-3d-04-03	18scp-3d-04-04	18scp-3d-04-05	18scp-3dark-01	18scp-3dark-02	18scp-3dark-03	18scp-3dark-04	18scp-3dark-05	18scp-3dark-06	18scp-3dark-07	18scp-3dark-08	18scp-3dark-09	18scp-3dark-10	18scp-3light-01	18scp-3light-02	18scp-3light-03	18scp-3light-04	18scp-3light-05	18scp-3light-06	18scp-3light-07	18scp-3light-08	18scp-3light-09
Comment	Scp I	Scp I	Scp I	Scp I	Scp I	Scp I	Scp I	Scp I	Scp I	Scp I	Scp I	Scp I	Scp I	Scp I	Scp I	Scp I	Scp I	Scp I	Scp I	Scp I	Scp I	Scp I	Scp I	Scp I	Scp I	Scp I	Scp I	Scp I	Scp I	Scp I	Scp I	Scp I	Scp I	Scp I	Scp I	Scp I	Scp I	Scp I	Scp I	Scp I	Scp I	Scp I	Scp I	Scp I	Scp I	Scp I	Scp I	Scp I	Scp I
wt%
SiO2	53.759	55.607	55.586	56.89	54.779	55.901	56.264	55.286	55.375	54.925	54.708	55.76	56.291	55.96	55.586	55.211	55.643	56.601	55.576	57.522	54.465	55.012	54.688	54.96	54.537	54.479	54.493	54.817	54.407	54.473	55.127	54.852	54.991	55.303	55.779	56.331	55.495	55.145	54.977	55.627	54.844	54.769	52.764	54.681	54.432	54.063	54.13	54.241	54.954
Al2O3	23.263	22.966	23.047	22.507	23.466	22.816	22.993	22.867	22.873	23.107	23.169	22.728	22.39	22.788	22.674	23.364	22.676	22.083	22.895	22.64	22.87	22.59	22.862	22.617	23.079	23.19	23.125	22.795	23.253	22.698	23.079	22.986	22.744	22.724	22.345	22.645	22.632	22.58	22.492	22.546	22.685	23.242	23.796	22.722	23.083	23.151	23.121	23.321	23.039
CaO	9.677	8.317	8.369	7.793	7.232	7.865	7.944	7.53	8.506	8.447	8.281	7.778	7.404	7.761	7.79	8.033	7.935	8.233	8.225	8.242	7.541	7.437	7.723	7.331	7.968	8.048	7.964	7.682	8.079	8.11	8.163	8.082	8.452	7.777	7.669	7.415	7.6	7.749	8.634	8.343	8.125	7.938	9.6	8.514	9.358	9.307	8.128	8.222	7.696
SrO	0.272	0.262	0.222	0.276	0.304	0.266	0.277	0.283	0.242	0.278	0.312	0.288	0.287	0.273	0.285	0.31	0.249	0.245	0.204	0.257	0.289	0.314	0.244	0.242	0.249	0.284	0.267	0.269	0.199	0.262	0.269	0.256	0.303	0.284	0.233	0.248	0.228	0.203	0.266	0.254	0.255	0.277	0.261	0.222	0.234	0.274	0.279	0.243	0.266
FeOa	0.065	b.d.l.b	b.d.l.	0.074	0.138	0.174	b.d.l.	0.059	0.043	0.071	b.d.l.	b.d.l.	b.d.l.	0.057	b.d.l.	b.d.l.	b.d.l.	b.d.l.	0.072	b.d.l.	b.d.l.	b.d.l.	0.061	0.046	b.d.l.	b.d.l.	b.d.l.	b.d.l.	b.d.l.	b.d.l.	0.049	0.067	0.044	b.d.l.	b.d.l.	b.d.l.	b.d.l.	0.064	b.d.l.	b.d.l.	b.d.l.	0.058	0.055	b.d.l.	b.d.l.	0.041	b.d.l.	0.073	0.07
MgO	b.d.l.	b.d.l.	b.d.l.	b.d.l.	b.d.l.	0.113	b.d.l.	b.d.l.	b.d.l.	b.d.l.	b.d.l.	b.d.l.	b.d.l.	b.d.l.	b.d.l.	b.d.l.	b.d.l.	b.d.l.	b.d.l.	b.d.l.	n.a.c	n.a.	n.a.	n.a.	n.a.	n.a.	n.a.	n.a.	n.a.	n.a.	n.a.	n.a.	n.a.	n.a.	n.a.	n.a.	n.a.	n.a.	n.a.	n.a.	n.a.	n.a.	n.a.	n.a.	n.a.	n.a.	n.a.	n.a.	n.a.
MnO	b.d.l.	b.d.l.	b.d.l.	b.d.l.	b.d.l.	b.d.l.	b.d.l.	b.d.l.	b.d.l.	b.d.l.	b.d.l.	b.d.l.	b.d.l.	b.d.l.	b.d.l.	b.d.l.	b.d.l.	b.d.l.	b.d.l.	b.d.l.	n.a.	n.a.	n.a.	n.a.	n.a.	n.a.	n.a.	n.a.	n.a.	n.a.	n.a.	n.a.	n.a.	n.a.	n.a.	n.a.	n.a.	n.a.	n.a.	n.a.	n.a.	n.a.	n.a.	n.a.	n.a.	n.a.	n.a.	n.a.	n.a.
TiO2	b.d.l.	b.d.l.	b.d.l.	b.d.l.	b.d.l.	b.d.l.	b.d.l.	b.d.l.	b.d.l.	b.d.l.	b.d.l.	b.d.l.	b.d.l.	b.d.l.	b.d.l.	b.d.l.	b.d.l.	b.d.l.	0.044	b.d.l.	n.a.	n.a.	n.a.	n.a.	n.a.	n.a.	n.a.	n.a.	n.a.	n.a.	n.a.	n.a.	n.a.	n.a.	n.a.	n.a.	n.a.	n.a.	n.a.	n.a.	n.a.	n.a.	n.a.	n.a.	n.a.	n.a.	n.a.	n.a.	n.a.
Na2O	7.356	8.398	7.995	7.994	8.258	8.031	8.05	8.743	8.218	8.178	8.24	8.492	8.714	8.654	8.622	8.232	8.087	9.174	8.46	8.961	8.331	8.377	8.463	8.522	8.211	8.551	8.513	8.376	8.655	8.438	8.658	8.717	8.415	8.89	9.032	9.027	8.939	8.98	8.04	8.197	8.536	8.65	7.656	8.422	7.727	7.404	8.434	8.539	8.448
K2O	1.716	1.65	1.881	1.645	1.812	1.856	2.001	1.831	1.901	1.929	1.936	1.841	1.964	1.982	1.813	2.011	1.916	1.752	1.852	1.968	1.978	1.947	1.884	1.842	2.021	1.607	1.707	1.877	1.394	1.511	1.055	0.973	1.028	1.005	1.081	1.078	1.11	1.039	1.238	1.093	1.402	1.519	1.362	1.077	1.308	1.29	1.682	1.465	1.741
Cl	2.965	3.195	3.208	3.293	3.328	3.236	3.475	3.466	3.238	3.284	3.258	3.39	3.396	3.435	3.32	3.43	3.317	3.159	3.221	3.224	3.315	3.392	3.23	3.218	3.261	3.066	3.134	3.228	3.104	3.058	2.891	2.834	2.725	2.956	3.069	2.996	2.985	2.991	2.776	2.786	2.979	3.223	2.53	2.781	2.663	2.622	3.162	3.102	3.276
SO3	0.151	0.097	0.132	0.07	0.124	0.276	0.189	0.152	0.243	0.166	0.186	0.182	0.189	0.129	0.077	0.164	0.129	0.122	0.166	0.137	0.177	0.138	0.172	0.138	0.167	0.177	0.143	0.171	0.169	0.171	b.d.l.	b.d.l.	0.04	0.062	b.d.l.	0.042	0.053	0.053	0.042	0.043	0.13	0.199	0.112	b.d.l.	0.058	b.d.l.	0.231	0.166	0.158
F	b.d.l.	b.d.l.	b.d.l.	b.d.l.	b.d.l.	b.d.l.	b.d.l.	b.d.l.	b.d.l.	b.d.l.	b.d.l.	b.d.l.	b.d.l.	b.d.l.	b.d.l.	b.d.l.	b.d.l.	b.d.l.	b.d.l.	b.d.l.	n.a.	n.a.	n.a.	n.a.	n.a.	n.a.	n.a.	n.a.	n.a.	n.a.	n.a.	n.a.	n.a.	n.a.	n.a.	n.a.	n.a.	n.a.	n.a.	n.a.	n.a.	n.a.	n.a.	n.a.	n.a.	n.a.	n.a.	n.a.	n.a.
Sub total	99.237	100.554	100.475	100.564	99.484	100.534	101.2	100.22	100.659	100.391	100.129	100.518	100.669	101.064	100.215	100.793	100.021	101.403	100.73	102.993	98.972	99.207	99.327	98.916	99.493	99.431	99.378	99.215	99.26	98.721	99.315	98.8	98.742	99.001	99.224	99.782	99.042	98.804	98.465	98.915	98.979	99.875	98.136	98.479	98.863	98.188	99.19	99.372	99.648
‘ - Cl = O	0.669111	0.721016	0.723949	0.743131	0.75103	0.730268	0.784203	0.782172	0.730719	0.7411	0.735233	0.765021	0.766375	0.775176	0.749224	0.774048	0.748547	0.712891	0.726883	0.72756	0.748028	0.765403	0.728848	0.72614	0.735843	0.691841	0.707185	0.728397	0.700416	0.690036	0.652353	0.639491	0.614895	0.66702	0.692518	0.676046	0.673564	0.674918	0.626403	0.628659	0.67221	0.727268	0.570893	0.627531	0.600905	0.591653	0.713504	0.699965	0.739228
CO2 (calc) d	1.62352	1.39931	1.35727	1.3154	1.13408	1.20551	0.913717	0.862933	1.18868	1.15402	1.17107	0.99491	0.990542	0.980986	1.17232	0.957388	1.14336	1.43762	1.29404	1.44763	1.03243	0.94938	1.19783	1.24223	1.15782	1.48646	1.39163	1.20613	1.42832	1.45574	1.94041	1.99813	2.16522	1.78172	1.62737	1.80682	1.74634	1.70195	2.05151	2.09323	1.6498	1.23346	2.35917	2.05147	2.24341	2.30525	1.24767	1.42681	1.16996
Total	99.7583	100.859	100.746	100.785	99.5645	100.688	101.086	100.071	100.8	100.496	100.252	100.482	100.629	101.008	100.325	100.721	100.111	101.744	100.952	103.327	99.2564	99.391	99.796	99.4321	99.915	100.226	100.062	99.6927	99.9879	99.4867	100.603	100.159	100.292	100.116	100.159	100.913	100.115	99.831	99.8901	100.38	99.9566	100.381	99.9243	99.9029	100.506	99.9016	99.7242	100.099	100.079
Atomic formula on the basis of Si + Al = 12 (Evans et al. 1969; Teertstra and Sherriff 1997)
apfue
Si	7.94673	8.07098	8.06067	8.18375	7.97382	8.10217	8.09886	8.06709	8.07065	8.02204	8.00437	8.10569	8.16976	8.10817	8.10372	8.00642	8.10619	8.2199	8.07768	8.19716	8.02742	8.08649	8.0392	8.08084	8.00673	7.9911	7.99927	8.05323	7.98032	8.04785	8.03535	8.03279	8.06754	8.08481	8.15148	8.14235	8.10462	8.09402	8.09627	8.12087	8.06733	7.99929	7.83539	8.05515	8.00113	7.97511	7.98189	7.96433	8.03161
Al	4.05327	3.92902	3.93933	3.81625	4.02618	3.89783	3.90114	3.93291	3.92935	3.97796	3.99563	3.89431	3.83024	3.89183	3.89628	3.99358	3.89381	3.7801	3.92232	3.80284	3.97258	3.91351	3.9608	3.91916	3.99327	4.0089	4.00073	3.94677	4.01968	3.95215	3.96465	3.96721	3.93246	3.91519	3.84852	3.85765	3.89538	3.90598	3.90373	3.87913	3.93267	4.00071	4.16461	3.94485	3.99887	4.02489	4.01811	4.03567	3.96839
Ca	1.53275	1.29347	1.30039	1.2012	1.12799	1.22145	1.22526	1.17731	1.32836	1.32194	1.29823	1.21152	1.15141	1.20492	1.21689	1.2482	1.23865	1.28113	1.28094	1.25851	1.19084	1.1713	1.21639	1.15489	1.25337	1.26483	1.25259	1.20919	1.26967	1.28377	1.27484	1.26812	1.32854	1.21815	1.2008	1.14837	1.18921	1.21863	1.36233	1.30499	1.28053	1.24221	1.52743	1.34381	1.47383	1.471	1.28416	1.2935	1.20513
Sr	0.0233166	0.0220524	0.0186688	0.0230242	0.0256616	0.0223574	0.0231223	0.0239468	0.0204536	0.0235461	0.0264722	0.0242783	0.0241552	0.0229386	0.0240948	0.0260695	0.021036	0.0206332	0.0171945	0.0212384	0.0246984	0.0267636	0.0207981	0.0206318	0.0211971	0.024155	0.0227265	0.022915	0.0169251	0.0224446	0.0227355	0.0217383	0.0257753	0.0240742	0.0197439	0.0207858	0.0193075	0.0172769	0.0227142	0.0215012	0.0217497	0.0234589	0.0224738	0.0189628	0.0199446	0.0234369	0.0238553	0.020689	0.0225422
Fe	0.00803574	0.00303467	0.00424472	0.00890274	0.0167999	0.0210914	0	0.00719995	0.0052413	0.00867258	0.00305908	0.00425511	0.00352001	0.0069071	0.000853479	0.00460863	0.00304594	0.00412949	0.008752	0.00381377	0.000739556	0	0.00749915	0.00565625	0	0.00355743	0.00392845	0	0	0	0.00597307	0.00820559	0.00539838	0	0	0	0	0.00785596	0	0.00317433	0.00282937	0.00708444	0.00683041	0.00394228	0	0.00505803	0.00283633	0.00896407	0.00855584
Mg	0	0	0	0	0.00781167	0.0244146	0	0	0	0	0	0	0	0	0	0	0	0	0	0	n.a.	n.a.	n.a.	n.a.	n.a.	n.a.	n.a.	n.a.	n.a.	n.a.	n.a.	n.a.	n.a.	n.a.	n.a.	n.a.	n.a.	n.a.	n.a.	n.a.	n.a.	n.a.	n.a.	n.a.	n.a.	n.a.	n.a.	n.a.	n.a.
Mn	0.00132823	0.00150481	0	0.000994281	0.000402443	0	0.00069644	0.000100854	0	0.0002019	0.00141578	0.000301426	0	0.0015022	0.00251914	0	0.00110762	0	0.0015069	0.000984968	n.a.	n.a.	n.a.	n.a.	n.a.	n.a.	n.a.	n.a.	n.a.	n.a.	n.a.	n.a.	n.a.	n.a.	n.a.	n.a.	n.a.	n.a.	n.a.	n.a.	n.a.	n.a.	n.a.	n.a.	n.a.	n.a.	n.a.	n.a.	n.a.
Ti	0	0	0	0.00129877	0.000109518	0	0	0.000219567	0.00219311	0.000439551	0	0	0.000545978	0.00109013	0.00175499	0	0.00361705	0	0.00481157	0	n.a.	n.a.	n.a.	n.a.	n.a.	n.a.	n.a.	n.a.	n.a.	n.a.	n.a.	n.a.	n.a.	n.a.	n.a.	n.a.	n.a.	n.a.	n.a.	n.a.	n.a.	n.a.	n.a.	n.a.	n.a.	n.a.	n.a.	n.a.	n.a.
Na	2.10843	2.36349	2.24804	2.22978	2.33081	2.257	2.24683	2.47368	2.32242	2.31602	2.33767	2.39363	2.45227	2.43132	2.43729	2.31472	2.28441	2.58334	2.38424	2.47609	2.38064	2.38742	2.41203	2.42934	2.33721	2.43182	2.42287	2.38577	2.46133	2.41699	2.44678	2.47502	2.39354	2.51976	2.5591	2.52978	2.53107	2.55548	2.2956	2.32011	2.4344	2.44946	2.20426	2.40541	2.20214	2.11758	2.41123	2.43089	2.39384
K	0.32362	0.305536	0.347997	0.3019	0.336505	0.343195	0.36747	0.340857	0.353475	0.359441	0.361379	0.34143	0.363658	0.366379	0.337208	0.372054	0.356109	0.324607	0.343417	0.357796	0.371911	0.365109	0.35331	0.345504	0.378516	0.300709	0.319666	0.351781	0.260845	0.284785	0.196176	0.181778	0.192396	0.187431	0.201533	0.198781	0.206802	0.194548	0.232583	0.203559	0.263089	0.283027	0.25802	0.202398	0.245278	0.242762	0.316408	0.274418	0.324605
Cl	0.74293	0.786056	0.788544	0.802961	0.821148	0.795016	0.84788	0.857268	0.799941	0.813025	0.808003	0.83532	0.835456	0.843641	0.820433	0.843127	0.819101	0.777639	0.793554	0.778772	0.828067	0.845048	0.804723	0.801898	0.811405	0.762206	0.779708	0.803732	0.771632	0.765701	0.714186	0.703391	0.677547	0.7324	0.760126	0.733952	0.738833	0.744043	0.692862	0.689321	0.742668	0.797811	0.636746	0.694322	0.663424	0.65553	0.790228	0.771945	0.811466
S	0.0167512	0.0105658	0.0143652	0.00755696	0.0135458	0.0300209	0.0204168	0.0166448	0.799941	0.0181951	0.0204231	0.019855	0.0205856	0.0140271	0.00842446	0.017848	0.0141035	0.0132964	0.0181067	0.0146515	0.0195772	0.015223	0.0189744	0.0152268	0.0183993	0.0194836	0.0157531	0.0188526	0.0186025	0.018959	0.00262525	0.00362667	0.00440382	0.00680193	0.00175471	0.00455587	0.00580864	0.00583786	0.00464166	0.00471091	0.0143504	0.0218117	0.0124813	0.00309539	0.00639801	0.00398528	0.0255623	0.0182915	0.0173293
F	0	0.0100998	0	0	0.000920824	0	0	0	0	0	0	0.00965563	0	0	0	0	0	0	0	0	n.a.	n.a.	n.a.	n.a.	n.a.	n.a.	n.a.	n.a.	n.a.	n.a.	n.a.	n.a.	n.a.	n.a.	n.a.	n.a.	n.a.	n.a.	n.a.	n.a.	n.a.	n.a.	n.a.	n.a.	n.a.	n.a.	n.a.	n.a.	n.a.
C	0.240319	0.203378	0.197091	0.189482	0.165306	0.174963	0.131704	0.126087	0.173481	0.16878	0.171574	0.144825	0.143958	0.142332	0.171142	0.139025	0.166795	0.209064	0.18834	0.206576	0.152356	0.139729	0.176302	0.182875	0.170195	0.21831	0.204539	0.177415	0.209766	0.21534	0.283188	0.292982	0.318049	0.260798	0.238119	0.261492	0.255358	0.25012	0.302497	0.305968	0.242982	0.180378	0.350772	0.302582	0.330178	0.340485	0.184209	0.209764	0.171205
Mef	39.1605	33.0919	33.7634	32.7718	30.6466	33.1484	32.3312	30.0405	33.5997	33.6084	32.9966	31.2005	29.514	30.6464	30.9629	32.2489	32.3699	30.9906	32.4177	31.1902	30.6329	30.3262	30.9102	29.7573	31.9418	32.0522	31.7412	31.0381	32.0945	32.5902	32.929	32.6823	34.3714	31.4533	30.6579	29.9958	30.6234	31.0067	35.3939	34.4528	32.5589	31.6563	38.63	34.3217	37.9016	38.7684	32.4115	32.6953	31.111
Eq. Ang	35.109	30.9674	31.311	27.2083	34.2061	29.9278	30.038	31.0969	30.9782	32.5987	33.1878	29.8104	27.6748	29.7276	29.8759	33.1193	29.7937	26.0033	30.7439	26.7614	32.4192	30.4503	32.0266	30.6385	33.109	33.6301	33.3576	31.559	33.9894	31.7384	32.155	32.2403	31.0819	30.5065	28.284	28.5882	29.8459	30.1992	30.1243	29.3043	31.0889	33.3571	38.8203	31.4952	33.2956	34.163	33.937	34.5225	32.2797
Al/(Al+Si)	0.337772	0.327418	0.328278	0.318021	0.335515	0.32482	0.325095	0.327742	0.327446	0.331497	0.33297	0.324526	0.319187	0.324319	0.32469	0.332798	0.324484	0.315008	0.32686	0.316903	0.331048	0.326126	0.330066	0.326596	0.332772	0.334075	0.333394	0.328898	0.334974	0.329346	0.330388	0.330601	0.327705	0.326266	0.32071	0.32147	0.324615	0.325498	0.325311	0.323261	0.327722	0.333393	0.347051	0.328738	0.333239	0.335407	0.334843	0.336306	0.330699
Cl/(Cl+CO3)	0.755587	0.79445	0.800037	0.809075	0.832424	0.819622	0.865551	0.871778	0.821782	0.828092	0.824849	0.852241	0.853016	0.855644	0.827404	0.858448	0.830819	0.788118	0.808187	0.790352	0.844602	0.858112	0.820288	0.814297	0.826615	0.777352	0.792187	0.819176	0.786258	0.780498	0.716066	0.705952	0.680544	0.737416	0.761463	0.737311	0.74315	0.748412	0.696093	0.692583	0.75348	0.8156	0.644794	0.696478	0.667696	0.658153	0.810958	0.786328	0.825776
a FeO as total iron.
b b.d.l. = below detection limit.
c n.a. = not analysed.
d CO2 contents are recalculated by assuming a full anion site occupancy and H2O-free compositions (Cl + S + C = 1; Evans et al. 1969; Teertstra and Sherriff 1997).
e apfu = atom per formula unit.
f Me (meionite equivalent) = 100 × (Ca + Mg + Fe + Mn + Sr)/(Na + K + Ca + Mg + Fe + Mn + Sr).
g Eq. An (equivalent anorthite) = 100 × (Al - 3)/3.
[truncated: 87 more columns]

## Sheet: Std-R6600
American Mineralogist: March 2024 Online Materials AM-24-38826 (use tabs to navigate to other tables)
Gao et al.: Halogen fractionation during vapor-brine phase separation
EPM analyses of R6600
Monitoring
Sample no.	Std-R6600-01	Std-R6600-02	Std-R6600-03	Std-R6600-04	Std-R6600-05	Std-R6600-06	Std-R6600-07	Std-R6600-08	Std-R6600-09	Std-R6600-10	Average	2SD	Ref. Val.f
wt%
SiO2	49.719	49.687	50.072	49.574	49.359	49.574	49.661	49.779	49.633	49.771	49.6829	0.347168	49.78
Al2O3	25.064	24.893	24.709	25.202	24.747	24.828	24.573	25.021	24.815	24.992	24.8844	0.356678	25.05
CaO	13.207	13.01	13.151	13.119	13.358	13.302	13.114	13.115	13.392	13.149	13.1917	0.23141	13.58
SrO	0.346	0.271	0.289	0.291	0.298	0.289	0.28	0.278	0.29	0.322	0.2954	0.0426164	0
FeOa	0.154	0.148	0.113	0.076	0.119	0.116	0.151	0.105	0.073	0.137	0.1192	0.0552072	0.17
MgO	n.a.b	n.a.	n.a.	n.a.	n.a.	n.a.	n.a.	n.a.	n.a.	n.a.			-
MnO	n.a.	n.a.	n.a.	n.a.	n.a.	n.a.	n.a.	n.a.	n.a.	n.a.			-
TiO2	n.a.	n.a.	n.a.	n.a.	n.a.	n.a.	n.a.	n.a.	n.a.	n.a.			-
Na2O	5.389	5.241	5.515	5.215	5.258	5.33	5.358	5.293	5.261	5.441	5.3301	0.182506	5.2
K2O	0.935	0.929	0.916	0.956	0.962	0.928	0.934	0.948	0.915	0.942	0.9365	0.0297489	0.94
Cl	1.338	1.414	1.415	1.391	1.366	1.406	1.403	1.374	1.407	1.363	1.3877	0.04951	1.43
SO3	1.552	1.52	1.531	1.535	1.405	1.562	1.578	1.439	1.478	1.517	1.5117	0.104629	1.32
F	n.a.	n.a.	n.a.	n.a.	n.a.	n.a.	n.a.	n.a.	n.a.	n.a.			-
Sub total	97.704	97.113	97.711	97.359	96.872	97.335	97.052	97.352	97.264	97.634	97.3396	0.535303	98.634
‘ - Cl = O	0.301919	0.319068	0.319294	0.313878	0.308237	0.317263	0.316586	0.310042	0.317489	0.30756	0.313134	0.0111719	0.322679
CO2 (calc) d	3.16853	3.04443	3.04849	3.09302	3.17025	3.01071	2.98602	3.19306	3.07561	3.14971	3.09398	0.138201	3.19039
Total	100.571	99.8384	100.44	100.138	99.734	100.028	99.7214	100.235	100.022	100.476	100.12	0.583468	101.502
Atomic formula on the basis of Si + Al = 12 (Evans et al. 1969; Teertstra and Sherriff 1997)
apfud
Si	7.52766	7.54504	7.58736	7.50403	7.54297	7.54599	7.57976	7.53585	7.55079	7.53865	7.54581		7.53266
Al	4.47234	4.45496	4.41264	4.49597	4.45703	4.45401	4.42024	4.46415	4.44921	4.46135	4.45419		4.46734
Ca	2.14244	2.11672	2.13512	2.12769	2.18718	2.16943	2.14458	2.12726	2.1829	2.13391	2.14672		2.20171
Sr	0.0303757	0.0238616	0.0253925	0.0255415	0.0264061	0.0255078	0.0247805	0.024403	0.0255818	0.0282804	0.0260131		0
Fe	0.0194993	0.018795	0.0143197	0.00962089	0.0152084	0.0147666	0.0192743	0.0132934	0.00928764	0.017354	0.0151419		0.0215131
Mg	n.a.	n.a.	n.a.	n.a.	n.a.	n.a.	n.a.	n.a.	n.a.	n.a.			-
Mn	n.a.	n.a.	n.a.	n.a.	n.a.	n.a.	n.a.	n.a.	n.a.	n.a.			-
Ti	n.a.	n.a.	n.a.	n.a.	n.a.	n.a.	n.a.	n.a.	n.a.	n.a.			-
Na	1.58191	1.54301	1.62024	1.5305	1.55788	1.57299	1.58555	1.55355	1.55177	1.59784	1.56952		1.52558
K	0.180594	0.179965	0.17707	0.184609	0.187545	0.180204	0.181861	0.183083	0.177581	0.182021	0.181453		0.181458
Cl	0.343334	0.363908	0.363392	0.356854	0.353793	0.362719	0.362928	0.35253	0.362776	0.349894	0.357213		0.366735
S	0.176339	0.173214	0.174097	0.174369	0.161128	0.178428	0.180745	0.163481	0.168739	0.172434	0.172297		0.149895
F	n.a.	n.a.	n.a.	n.a.	n.a.	n.a.	n.a.	n.a.	n.a.	n.a.			-
C	0.480327	0.462878	0.462511	0.468777	0.485078	0.458853	0.456326	0.483989	0.468485	0.477672	0.47049		0.48337
Mee	54.7256	54.7514	54.5884	55.663	55.9126	55.5943	55.1051	55.337	56.0837	54.8494	55.2611		56.3278
EqAnf	49.0782	48.4986	47.088	49.8656	48.5678	48.4671	47.3413	48.8049	48.3072	48.7115	48.473		48.9113
Al/(Al+Si)	0.372695	0.371247	0.36772	0.374664	0.371419	0.371168	0.368353	0.372012	0.370768	0.371779	0.371183		0.372278
Cl/(Cl+CO3)	0.296903	0.296903	0.317017	0.310213	0.30113	0.318337	0.319661	0.30085	0.31388	0.302036	0.307693		0.309498
a FeO as total iron.
b n.a. = not analysed.
c CO2 contents are recalculated by assuming a full anion site occupancy and H2O-free compositions (Cl + S + C = 1; Evans et al. 1969; Teertstra and Sherriff 1997).
d apfu = atom per formula unit.
e Me (meionite equivalent) = 100 × (Ca + Mg + Fe + Mn + Sr)/(Na + K + Ca + Mg + Fe + Mn + Sr).
f Eq. An (equivalent anorthite) = 100 × (Al - 3)/3.
g Ref. Val. from Jarosewich et al. (1980).

## Sheet: References
References
Evans, B.W., Shaw, D.M. and Haughton, D.R. (1969) Scapolite stoichiometry. Contributions to Mineralogy and Petrology, 24(4), 293–305.
Teertstra, D.K. and Sherriff, B.L. (1997) Substitutional mechanisms, compositional trends and the endmember formulae of scapolite. Chemical Geology, 136(3-4), 233–260.
Jarosewich, E., Nelen, J.A. and Norberg, J.A. (1980) Reference Samples for Electron Microprobe Analysis. Geostandard Newsletter, 4(1), 43–47.
